# Supplementary material for: High-voltage capabilities of ultra-thin Nb2O5nanosheet coated LiNi1/3Co1/3Mn1/3O2cathodes
Source: Royal Society of Chemistry journal article supplement (doi:10.1039/c6ra10155k), 2016-01-01
Supplement: c6ra10155k1.pdf [file c6ra10155k1.pdf]

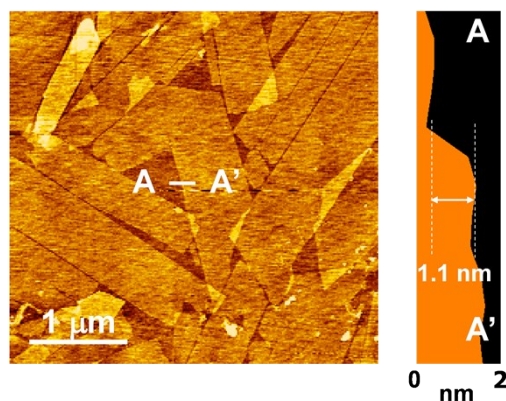

**Figure S1.** Typical AFM image of the Nb<sub>2</sub>O<sub>5</sub> nanosheet spread on a Si wafer

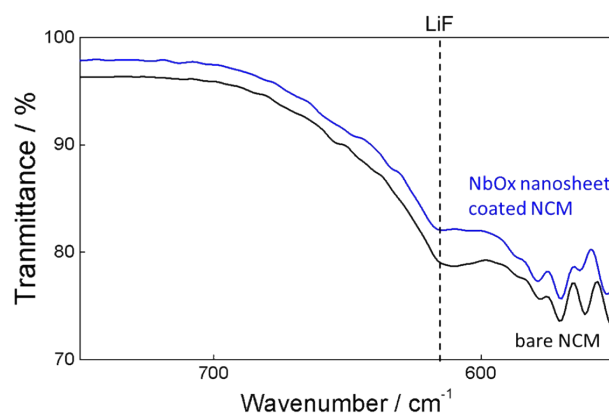

**Figure S4.** FT-IR spectra of bare (black) and Nb<sub>2</sub>O<sub>5</sub> nanosheet coated (blue) NCM electrodes after 100th cycles

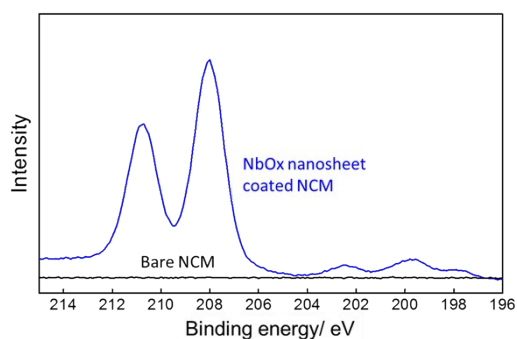

**Figure S2.** Typical XPS Nb<sub>3d5/2</sub> core level spectra of bare NCM electrodes (black) and Nb<sub>2</sub>O<sub>5</sub> nanosheet coated NCM electrodes (blue)

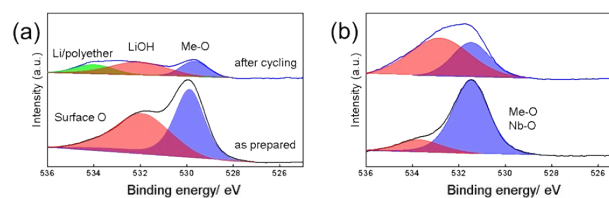

**Figure S5.** XPS O<sub>1s</sub> core level profiles of bare (a) and Nb<sub>2</sub>O<sub>5</sub> nanosheet coated (b) NCM electrodes after 100th cycles.

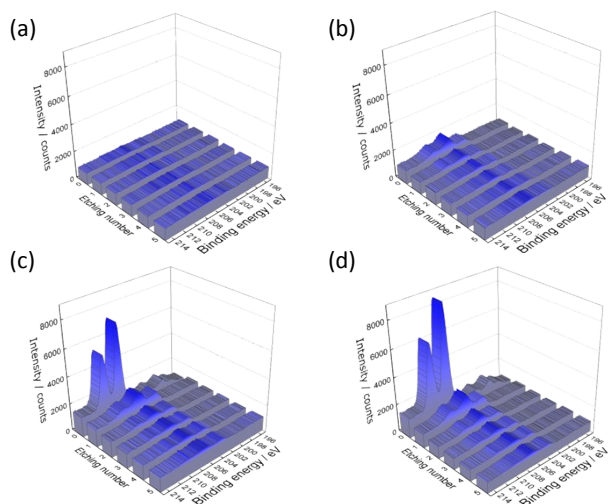

**Figure S3.** Changes in XPS Nb<sub>3d5/2</sub> core level spectra of NCM electrodes with different Nb<sub>2</sub>O<sub>5</sub> nanosheet coating conditions as a function of Ar-sputtering times: (a) bare NCM, (b) 0.1wt%, (c) 0.5wt%, (d) 1 wt%.
